# Supplementary material for: Sodium selenate regulates the brain ionome in a transgenic mouse model of Alzheimer’s disease
Source: PubMed Central journal article supplement (PMC5180247; doi:10.1038/srep39290), 2016-12-23
Supplement: srep39290-s1.pdf [file srep39290-s1.pdf]

# **Sodium selenate regulates the brain ionome in a transgenic mouse model of Alzheimer's disease**

**Lin Zheng<sup>1,†</sup>, Hua-Zhang Zhu<sup>1,†</sup>, Bing-Tao Wang<sup>2</sup>, Qiong-Hui Zhao<sup>2</sup>, Xiu-Bo Du<sup>1</sup>,  
Yi Zheng<sup>3</sup>, Liang Jiang<sup>1</sup>, Jia-Zuan Ni<sup>1</sup>, Yan Zhang<sup>1,4,\*</sup>, Qiong Liu<sup>1,\*</sup>**

<sup>1</sup>:College of Life Sciences & Oceanography, Shenzhen University, Shenzhen, 518060, Guangdong Province, P. R. China

<sup>2</sup>:Shenzhen Entry-exit Inspection and Quarantine Bureau, Futian Huanggang Port, Shenzhen,518033,Guangdong Province, P. R. China

<sup>3</sup>:Shanghai Synchrotron Radiation Facility (SSRF), Shanghai Institute of Applied Physics, Chinese Academy of Sciences, Shanghai 201204, P. R. China

<sup>4</sup>: Key Laboratory of Nutrition and Metabolism, Institute for Nutritional Sciences, Shanghai Institutes for Biological Sciences, Chinese Academy of Sciences, University of Chinese Academy of Sciences, Shanghai 200031, P. R. China

## Supplementary figures

**Supplementary Fig. S1. Clustering of the ionome.** The color scale is from saturated blue (significantly negative correlation) to white (no significant correlation) and then to saturated red (significantly positive correlation). (A) WT mice; (B) 3×Tg-AD mice; (C) Se-treated mice.

**Supplementary Fig. S2. The decision-tree analysis for group classification.** The total number of samples is 66. The text at the top of a branch node indicates the rules. The numbers shown in a tree leaf node represent the correctly classified and covered samples by the corresponding decision rules. The bottom of the branch node shows the branch condition: left for “yes” and right for “no”. For example, if  $Fe \geq 22$  covers 38 samples with 30 correctly classified and 8 misclassified samples. The accuracy rate for the rule  $Fe \geq 22$  is 88% (58/66), and for the rule  $Se < 49$  is 92% (61/66).

**Supplementary Fig. S3. The elemental correlation network.** Each node represents different elements. Differentially changed elements (DCEs) are highlighted in red (increased) and green (decreased). Green and red lines represent negative and positive correlation, respectively. Different color scales represent the magnitude of SCCs.

# Supplementary Figure 1

## A

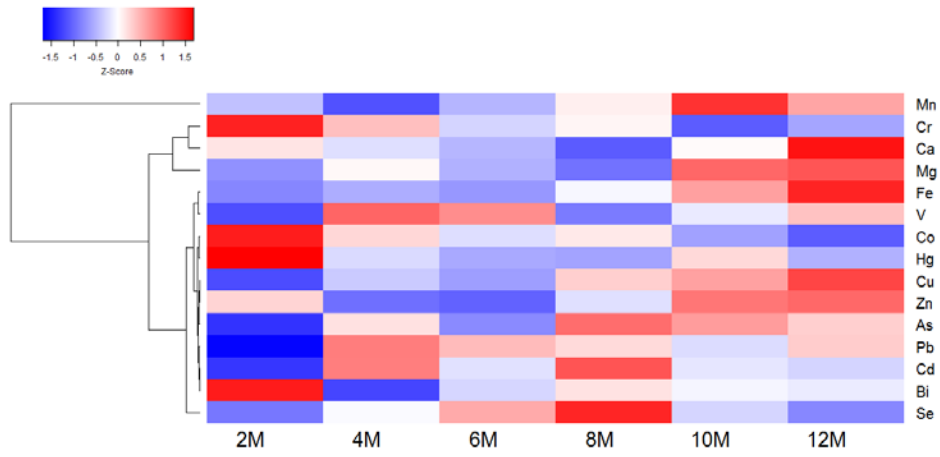

## B

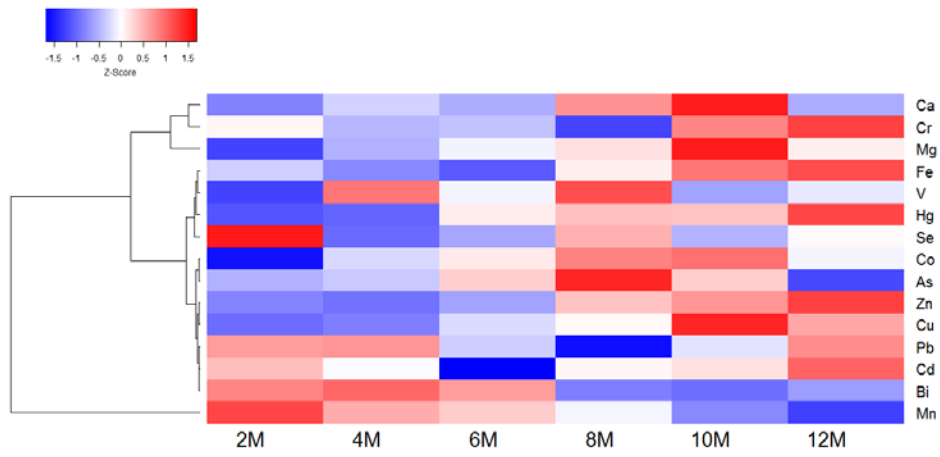

## C

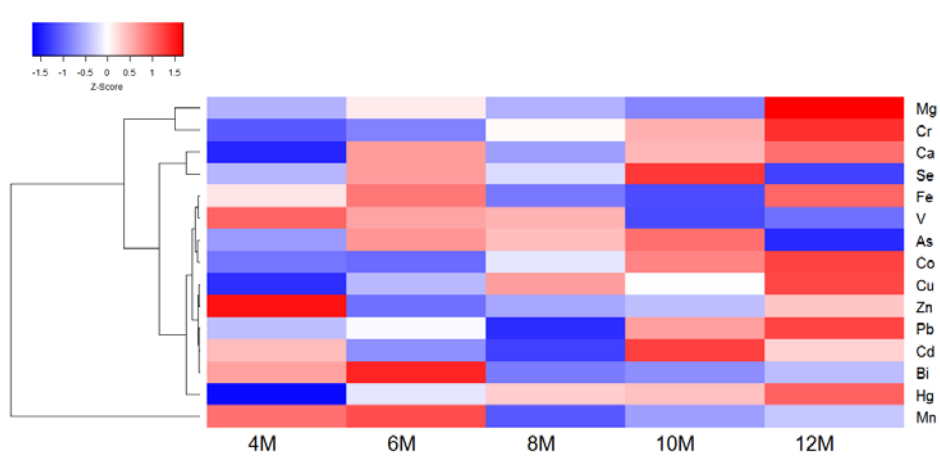

## Supplementary Figure 2

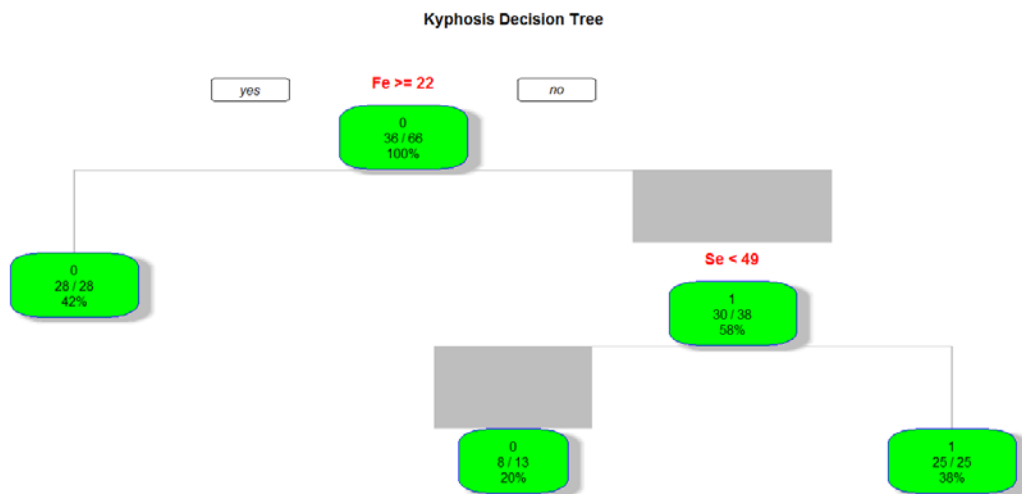



## Supplementary tables

**Supplementary Table 1. Distribution of pairwise SCCs in different groups**

| Element-<br>element<br>interaction | WT group     |               |              |              |               |              | 3×Tg-AD group |               |              |              |               |               | Se-treated group |               |              |               |               |
|------------------------------------|--------------|---------------|--------------|--------------|---------------|--------------|---------------|---------------|--------------|--------------|---------------|---------------|------------------|---------------|--------------|---------------|---------------|
|                                    | 2-<br>month  | 4-<br>month   | 6-<br>month  | 8-<br>month  | 10-<br>month  | 12-<br>month | 2-<br>month   | 4-<br>month   | 6-<br>month  | 8-<br>month  | 10-<br>month  | 12-<br>month  | 4-<br>month      | 6-<br>month   | 8-<br>month  | 10-<br>month  | 12-<br>month  |
| Fe-Mg                              | 0.086        | -0.714        | 0.086        | 0.657        | 0.143         | 0.486        | -0.086        | -0.200        | 0.314        | -0.086       | 0.486         | 0.086         | -0.714           | 0.714         | 0.371        | 0.714         | <b>0.943</b>  |
| Fe-Ca                              | 0.657        | -0.657        | 0.314        | <b>0.812</b> | <b>-0.841</b> | 0.086        | -0.200        | <b>0.886</b>  | -0.600       | 0.543        | 0.600         | <b>0.771</b>  | 0.600            | 0.314         | -0.314       | -0.200        | 0.257         |
| Fe-V                               | <b>0.771</b> | <b>-0.771</b> | -0.086       | -0.200       | 0.257         | -0.657       | 0.086         | -0.657        | 0.200        | 0.486        | -0.086        | -0.257        | 0.429            | 0.486         | 0.371        | -0.429        | -0.714        |
| Fe-Mn                              | 0.543        | -0.600        | 0.543        | 0.371        | -0.200        | <b>0.771</b> | -0.086        | <b>0.886</b>  | <b>0.886</b> | 0.200        | <b>0.829</b>  | 0.314         | -0.319           | 0.371         | -0.600       | 0.143         | 0.200         |
| Fe-Co                              | <b>0.829</b> | -0.600        | 0.429        | 0.143        | 0.143         | -0.143       | -0.429        | 0.600         | 0.543        | -0.143       | 0.657         | -0.600        | <b>-0.771</b>    | 0.257         | 0.486        | -0.029        | <b>0.829</b>  |
| Fe-Zn                              | -0.086       | -0.029        | 0.429        | <b>0.771</b> | 0.086         | 0.371        | -0.029        | <b>0.829</b>  | 0.371        | <b>0.771</b> | 0.657         | 0.657         | 0.200            | <b>0.771</b>  | -0.086       | 0.143         | 0.086         |
| Fe-Cu                              | 0.086        | <b>0.829</b>  | 0.657        | 0.657        | 0.543         | <b>0.829</b> | 0.257         | <b>0.943</b>  | -0.029       | -0.543       | 0.486         | -0.200        | <b>0.829</b>     | 0.371         | <b>0.886</b> | 0.143         | 0.486         |
| Fe-As                              | 0.200        | -0.600        | -0.086       | 0.314        | 0.086         | -0.257       | -0.429        | 0.086         | -0.257       | 0.314        | -0.086        | -0.143        | -0.143           | <b>0.771</b>  | 0.314        | -0.371        | -0.486        |
| Fe-Cd                              | <b>0.771</b> | -0.600        | -0.086       | 0.314        | 0.314         | -0.086       | 0.086         | 0.086         | 0.029        | 0.143        | -0.143        | -0.029        | 0.600            | <b>-0.771</b> | -0.486       | <b>0.829</b>  | -0.371        |
| Fe-Pb                              | 0.543        | -0.657        | -0.086       | -0.314       | -0.314        | -0.600       | <b>-0.771</b> | <b>0.943</b>  | 0.257        | 0.314        | 0.200         | 0.714         | -0.257           | 0.314         | 0.543        | 0.200         | 0.314         |
| Fe-Cr                              | 0.314        | -0.657        | 0.600        | 0.314        | 0.029         | -0.257       | 0.314         | <b>-0.771</b> | -0.029       | -0.086       | 0.600         | 0.371         | 0.143            | 0.429         | 0.486        | -0.257        | 0.486         |
| Fe-Bi                              | 0.600        | -0.657        | -0.371       | 0.314        | 0.314         | -0.086       | 0.086         | 0.600         | -0.029       | -0.029       | 0.143         | -0.371        | -0.314           | <b>0.771</b>  | 0.493        | <b>-0.886</b> | 0.029         |
| Fe-Se                              | -0.543       | -0.714        | -0.429       | -0.086       | -0.486        | -0.257       | 0.371         | -0.714        | 0.257        | 0.657        | -0.429        | <b>-0.829</b> | -0.486           | -0.257        | -0.600       | <b>-0.943</b> | 0.600         |
| Fe-Hg                              | 0.600        | -0.200        | 0.371        | 0.486        | -0.486        | 0.086        | 0.657         | 0.029         | <b>0.829</b> | -0.143       | 0.200         | 0.714         | 0.200            | -0.714        | 0.200        | 0.657         | 0.029         |
| Mg-Ca                              | 0.486        | 0.486         | 0.543        | <b>0.812</b> | 0.116         | 0.600        | <b>0.886</b>  | -0.086        | 0.314        | 0.429        | <b>0.943</b>  | 0.543         | -0.543           | 0.086         | -0.600       | -0.600        | 0.371         |
| Mg-V                               | 0.029        | 0.429         | -0.086       | -0.714       | 0.257         | -0.714       | -0.543        | -0.314        | <b>0.771</b> | 0.029        | <b>-0.771</b> | -0.371        | 0.257            | 0.029         | -0.029       | -0.429        | <b>-0.771</b> |
| Mg-Mn                              | 0.257        | 0.257         | <b>0.829</b> | 0.543        | 0.314         | <b>0.829</b> | <b>0.886</b>  | 0.257         | 0.257        | -0.257       | <b>0.771</b>  | <b>0.771</b>  | 0.116            | 0.543         | -0.086       | 0.714         | -0.029        |
| Mg-Co                              | 0.314        | 0.314         | 0.086        | -0.486       | -0.200        | -0.257       | 0.543         | 0.143         | -0.143       | 0.029        | <b>0.829</b>  | 0.314         | 0.257            | -0.086        | 0.143        | 0.486         | <b>0.771</b>  |
| Mg-Zn                              | 0.600        | -0.200        | 0.657        | 0.257        | 0.086         | 0.543        | -0.200        | -0.429        | -0.371       | -0.029       | 0.543         | 0.429         | -0.429           | 0.600         | -0.257       | -0.143        | 0.371         |
| Mg-Cu                              | 0.486        | <b>-0.886</b> | 0.371        | 0.257        | 0.029         | 0.714        | <b>0.886</b>  | -0.029        | -0.371       | -0.086       | <b>1.000</b>  | -0.086        | <b>-0.943</b>    | -0.029        | 0.086        | 0.429         | 0.314         |

|       |               |              |              |              |               |              |              |               |               |               |               |               |              |               |               |               |               |
|-------|---------------|--------------|--------------|--------------|---------------|--------------|--------------|---------------|---------------|---------------|---------------|---------------|--------------|---------------|---------------|---------------|---------------|
| Mg-As | 0.600         | 0.314        | 0.371        | -0.143       | -0.086        | -0.371       | -0.143       | 0.143         | 0.086         | -0.429        | -0.600        | 0.086         | -0.029       | <b>0.886</b>  | -0.314        | 0.029         | -0.600        |
| Mg-Cd | 0.029         | 0.314        | 0.029        | -0.257       | -0.029        | -0.029       | -0.086       | 0.143         | -0.143        | 0.143         | -0.657        | <b>0.886</b>  | 0.029        | -0.314        | 0.143         | <b>0.771</b>  | -0.429        |
| Mg-Pb | <b>-0.771</b> | 0.200        | -0.371       | -0.086       | 0.371         | -0.200       | 0.429        | -0.029        | -0.086        | -0.143        | -0.086        | 0.486         | 0.543        | 0.657         | -0.257        | 0.600         | 0.486         |
| Mg-Cr | 0.600         | 0.486        | 0.086        | -0.257       | 0.371         | -0.086       | 0.600        | 0.314         | -0.543        | <b>0.886</b>  | <b>0.943</b>  | 0.600         | -0.429       | 0.429         | 0.600         | 0.086         | 0.314         |
| Mg-Bi | -0.486        | 0.486        | 0.143        | -0.257       | -0.029        | -0.029       | 0.143        | 0.657         | 0.406         | -0.200        | -0.029        | 0.429         | 0.371        | 0.600         | 0.522         | -0.657        | -0.257        |
| Mg-Se | <b>-0.771</b> | 0.714        | -0.143       | -0.657       | <b>-0.829</b> | -0.429       | -0.257       | 0.600         | -0.086        | 0.429         | -0.086        | -0.371        | 0.257        | 0.086         | 0.200         | -0.543        | 0.657         |
| Mg-Hg | 0.657         | 0.029        | <b>0.943</b> | -0.029       | 0.714         | 0.600        | 0.257        | 0.086         | 0.600         | -0.657        | 0.257         | 0.029         | -0.657       | -0.714        | <b>0.829</b>  | 0.543         | -0.086        |
| Ca-V  | 0.257         | <b>0.886</b> | -0.086       | -0.493       | -0.580        | -0.543       | -0.429       | <b>-0.829</b> | 0.200         | 0.086         | <b>-0.829</b> | -0.143        | -0.086       | 0.143         | -0.143        | -0.086        | 0.086         |
| Ca-Mn | <b>0.943</b>  | <b>0.943</b> | 0.600        | 0.232        | 0.696         | 0.429        | 0.600        | <b>0.886</b>  | <b>-0.771</b> | -0.257        | <b>0.829</b>  | <b>0.771</b>  | -0.029       | <b>0.771</b>  | -0.314        | <b>-0.829</b> | -0.486        |
| Ca-Co | 0.486         | <b>0.943</b> | -0.086       | -0.029       | -0.522        | -0.143       | 0.600        | 0.429         | <b>-0.829</b> | 0.086         | <b>0.943</b>  | -0.543        | -0.486       | 0.143         | -0.600        | -0.543        | -0.086        |
| Ca-Zn | -0.257        | 0.714        | 0.257        | 0.464        | 0.406         | 0.257        | -0.029       | <b>0.886</b>  | -0.714        | 0.543         | 0.429         | <b>0.943</b>  | -0.086       | <b>0.771</b>  | -0.371        | 0.486         | 0.143         |
| Ca-Cu | 0.543         | -0.429       | -0.086       | 0.319        | -0.087        | 0.486        | <b>0.829</b> | <b>0.943</b>  | 0.314         | 0.029         | <b>0.943</b>  | -0.543        | 0.429        | -0.086        | -0.371        | -0.371        | -0.314        |
| Ca-As | -0.029        | 0.486        | 0.600        | -0.058       | -0.464        | -0.714       | -0.257       | -0.257        | <b>0.771</b>  | 0.543         | -0.657        | -0.257        | 0.486        | 0.086         | -0.029        | -0.200        | -0.086        |
| Ca-Cd | 0.257         | <b>0.943</b> | -0.086       | 0.203        | -0.667        | -0.086       | 0.086        | -0.257        | -0.600        | 0.257         | -0.600        | 0.429         | -0.029       | <b>-0.771</b> | -0.429        | -0.371        | -0.600        |
| Ca-Pb | -0.029        | 0.257        | -0.371       | -0.348       | 0.638         | -0.029       | 0.600        | <b>0.943</b>  | <b>-0.771</b> | -0.029        | -0.257        | <b>0.943</b>  | 0.143        | 0.086         | -0.143        | -0.200        | 0.029         |
| Ca-Cr | 0.714         | <b>1.000</b> | -0.257       | 0.203        | 0.029         | -0.143       | 0.257        | <b>-0.771</b> | 0.029         | 0.086         | <b>1.000</b>  | 0.314         | 0.314        | <b>0.771</b>  | -0.657        | 0.371         | -0.657        |
| Ca-Bi | 0.429         | <b>1.000</b> | 0.200        | 0.203        | -0.667        | -0.086       | 0.029        | 0.600         | -0.087        | -0.257        | 0.086         | -0.257        | -0.714       | -0.029        | <b>-0.841</b> | -0.029        | -0.086        |
| Ca-Se | -0.657        | <b>0.829</b> | 0.086        | -0.174       | 0.290         | -0.371       | -0.143       | -0.371        | -0.657        | 0.371         | 0.029         | <b>-0.943</b> | 0.257        | 0.143         | 0.029         | 0.257         | <b>0.886</b>  |
| Ca-Hg | 0.486         | 0.371        | 0.486        | 0.377        | 0.667         | <b>0.886</b> | 0.429        | 0.486         | -0.543        | <b>-0.829</b> | 0.371         | 0.714         | 0.371        | -0.086        | -0.314        | 0.314         | <b>-0.771</b> |
| V-Mn  | 0.086         | <b>0.829</b> | 0.086        | -0.657       | <b>-0.771</b> | -0.600       | -0.543       | <b>-0.829</b> | 0.371         | <b>0.829</b>  | -0.429        | -0.257        | -0.551       | 0.029         | -0.429        | -0.086        | 0.086         |
| V-Co  | <b>0.943</b>  | <b>0.943</b> | 0.029        | <b>0.771</b> | <b>0.829</b>  | 0.657        | 0.029        | -0.371        | -0.257        | -0.029        | <b>-0.771</b> | -0.143        | -0.543       | 0.086         | -0.257        | -0.086        | <b>-0.886</b> |
| V-Zn  | 0.200         | 0.600        | 0.371        | 0.429        | <b>-0.771</b> | -0.029       | -0.600       | -0.714        | -0.029        | <b>0.829</b>  | 0.029         | -0.086        | -0.029       | 0.257         | 0.086         | -0.600        | -0.314        |
| V-Cu  | 0.257         | -0.429       | 0.086        | -0.314       | -0.657        | -0.714       | -0.314       | -0.714        | -0.600        | <b>-0.943</b> | <b>-0.771</b> | -0.314        | 0.029        | 0.200         | 0.200         | 0.257         | -0.486        |
| V-As  | 0.200         | 0.486        | 0.543        | <b>0.771</b> | <b>0.886</b>  | <b>0.771</b> | -0.543       | -0.029        | -0.257        | -0.314        | <b>0.829</b>  | -0.600        | -0.429       | -0.086        | -0.486        | -0.429        | 0.371         |
| V-Cd  | <b>1.000</b>  | <b>0.943</b> | 0.200        | 0.714        | <b>0.943</b>  | 0.600        | 0.657        | 0.143         | 0.314         | -0.143        | 0.600         | -0.086        | <b>0.829</b> | -0.600        | 0.143         | <b>-0.771</b> | -0.143        |
| V-Pb  | 0.543         | 0.257        | <b>0.829</b> | 0.314        | -0.600        | <b>0.771</b> | -0.543       | -0.714        | 0.257         | <b>0.943</b>  | 0.543         | 0.086         | -0.029       | 0.143         | <b>0.886</b>  | -0.657        | -0.257        |

|       |              |              |              |               |               |              |              |              |               |               |               |               |               |               |               |               |               |
|-------|--------------|--------------|--------------|---------------|---------------|--------------|--------------|--------------|---------------|---------------|---------------|---------------|---------------|---------------|---------------|---------------|---------------|
| V-Cr  | 0.086        | <b>0.886</b> | 0.143        | 0.714         | 0.086         | 0.714        | -0.600       | 0.314        | <b>-0.886</b> | 0.314         | <b>-0.829</b> | -0.486        | -0.600        | -0.086        | 0.143         | -0.314        | -0.657        |
| V-Bi  | 0.143        | <b>0.886</b> | 0.429        | 0.714         | <b>0.943</b>  | 0.600        | 0.314        | -0.714       | <b>0.812</b>  | 0.543         | -0.086        | -0.600        | 0.086         | 0.600         | 0.319         | <b>0.771</b>  | 0.143         |
| V-Se  | -0.257       | 0.714        | -0.314       | <b>0.829</b>  | -0.543        | <b>0.829</b> | -0.429       | -0.029       | 0.371         | <b>0.829</b>  | -0.371        | 0.257         | -0.371        | 0.086         | 0.143         | 0.314         | -0.314        |
| V-Hg  | 0.714        | 0.657        | -0.029       | -0.029        | 0.029         | -0.257       | -0.143       | -0.486       | 0.371         | -0.143        | -0.429        | -0.029        | -0.429        | -0.371        | -0.543        | <b>-0.771</b> | 0.029         |
| Mn-Co | 0.257        | <b>0.886</b> | 0.086        | <b>-0.771</b> | <b>-0.771</b> | -0.086       | 0.543        | 0.600        | 0.600         | 0.371         | 0.714         | -0.314        | 0.232         | -0.314        | 0.314         | 0.429         | 0.314         |
| Mn-Zn | -0.486       | <b>0.771</b> | 0.714        | -0.086        | <b>0.886</b>  | 0.600        | -0.257       | 0.657        | 0.600         | 0.600         | <b>0.771</b>  | <b>0.829</b>  | 0.000         | <b>0.829</b>  | 0.029         | -0.200        | -0.200        |
| Mn-Cu | 0.486        | -0.257       | 0.543        | 0.657         | 0.600         | <b>0.943</b> | 0.657        | <b>0.943</b> | -0.429        | <b>-0.771</b> | <b>0.771</b>  | -0.657        | -0.348        | -0.486        | -0.314        | 0.200         | 0.029         |
| Mn-As | -0.257       | 0.429        | 0.486        | -0.257        | <b>-0.771</b> | -0.143       | 0.143        | 0.029        | -0.657        | -0.371        | -0.143        | 0.200         | 0.609         | 0.429         | 0.086         | 0.486         | -0.371        |
| Mn-Cd | 0.086        | <b>0.886</b> | -0.200       | -0.714        | <b>-0.829</b> | 0.143        | -0.371       | 0.029        | 0.486         | 0.143         | -0.200        | <b>0.771</b>  | -0.348        | -0.543        | <b>0.771</b>  | 0.371         | -0.257        |
| Mn-Pb | 0.086        | 0.429        | -0.086       | -0.486        | 0.714         | -0.143       | 0.314        | <b>0.943</b> | 0.657         | <b>0.943</b>  | 0.143         | 0.600         | 0.522         | 0.657         | -0.429        | 0.314         | -0.200        |
| Mn-Cr | 0.543        | <b>0.943</b> | 0.257        | -0.714        | 0.029         | 0.086        | <b>0.829</b> | -0.657       | -0.371        | 0.086         | <b>0.829</b>  | 0.429         | <b>0.841</b>  | <b>0.886</b>  | -0.371        | -0.086        | 0.543         |
| Mn-Bi | 0.600        | <b>0.943</b> | -0.143       | -0.714        | <b>-0.829</b> | 0.143        | 0.029        | <b>0.886</b> | 0.348         | 0.314         | 0.314         | 0.314         | -0.029        | 0.029         | -0.174        | -0.029        | 0.257         |
| Mn-Se | -0.486       | 0.657        | -0.543       | <b>-0.829</b> | -0.029        | -0.086       | -0.257       | -0.371       | 0.657         | 0.543         | -0.314        | -0.600        | 0.174         | 0.543         | 0.029         | -0.029        | -0.429        |
| Mn-Hg | 0.257        | 0.257        | <b>0.943</b> | -0.143        | 0.486         | 0.543        | -0.086       | 0.200        | <b>0.829</b>  | 0.257         | 0.371         | 0.600         | -0.464        | -0.486        | 0.086         | -0.029        | 0.600         |
| Co-Zn | 0.257        | <b>0.771</b> | 0.657        | 0.543         | -0.600        | 0.657        | -0.257       | 0.257        | 0.200         | 0.086         | 0.257         | -0.714        | 0.429         | -0.029        | 0.200         | -0.714        | 0.143         |
| Co-Cu | 0.371        | -0.314       | <b>0.771</b> | -0.086        | -0.657        | -0.257       | 0.314        | 0.486        | -0.143        | 0.086         | <b>0.829</b>  | <b>0.771</b>  | -0.429        | <b>0.943</b>  | <b>0.771</b>  | <b>0.829</b>  | 0.429         |
| Co-As | 0.314        | 0.543        | -0.543       | 0.543         | <b>0.886</b>  | 0.429        | 0.029        | 0.200        | -0.600        | -0.029        | <b>-0.771</b> | 0.086         | 0.314         | -0.086        | <b>0.771</b>  | -0.029        | -0.486        |
| Co-Cd | <b>0.943</b> | <b>1.000</b> | <b>0.829</b> | <b>0.943</b>  | <b>0.943</b>  | <b>0.943</b> | -0.143       | 0.714        | 0.314         | <b>0.886</b>  | -0.657        | 0.257         | <b>-0.829</b> | -0.371        | -0.029        | 0.143         | -0.086        |
| Co-Pb | 0.314        | 0.143        | -0.314       | 0.200         | <b>-0.886</b> | 0.600        | 0.543        | 0.486        | 0.600         | 0.200         | -0.371        | -0.429        | -0.314        | <b>-0.771</b> | 0.086         | <b>0.771</b>  | 0.029         |
| Co-Cr | 0.371        | <b>0.943</b> | <b>0.886</b> | <b>0.943</b>  | -0.371        | <b>0.829</b> | 0.257        | -0.486       | 0.029         | -0.029        | <b>0.943</b>  | 0.257         | -0.029        | -0.314        | 0.257         | 0.486         | <b>0.771</b>  |
| Co-Bi | 0.086        | <b>0.943</b> | 0.429        | <b>0.943</b>  | <b>0.943</b>  | <b>0.943</b> | -0.314       | 0.543        | 0.029         | -0.657        | -0.029        | 0.429         | -0.086        | 0.486         | 0.406         | -0.029        | 0.086         |
| Co-Se | -0.486       | <b>0.771</b> | 0.314        | <b>0.943</b>  | -0.143        | 0.714        | -0.257       | -0.371       | 0.257         | 0.029         | 0.086         | 0.600         | 0.600         | <b>-0.886</b> | <b>-0.771</b> | 0.086         | 0.314         |
| Co-Hg | <b>0.829</b> | 0.600        | 0.200        | 0.543         | -0.257        | 0.257        | -0.200       | -0.257       | 0.600         | 0.086         | 0.314         | <b>-0.886</b> | 0.086         | 0.486         | 0.257         | -0.029        | 0.029         |
| Zn-Cu | -0.029       | 0.314        | <b>0.829</b> | 0.257         | <b>0.771</b>  | 0.371        | -0.314       | <b>0.771</b> | -0.371        | -0.714        | 0.543         | <b>-0.771</b> | 0.371         | -0.086        | 0.143         | <b>-0.886</b> | -0.543        |
| Zn-As | <b>0.886</b> | 0.086        | 0.143        | <b>0.829</b>  | <b>-0.771</b> | 0.086        | 0.600        | -0.086       | -0.600        | 0.200         | 0.257         | -0.143        | 0.257         | 0.657         | 0.257         | 0.486         | <b>-0.771</b> |
| Zn-Cd | 0.200        | <b>0.771</b> | 0.486        | 0.714         | -0.714        | <b>0.771</b> | -0.600       | -0.257       | 0.657         | 0.086         | 0.086         | 0.371         | -0.257        | <b>-0.829</b> | -0.086        | 0.314         | -0.429        |



|       |        |               |              |              |               |              |               |               |               |               |               |               |               |               |               |               |               |
|-------|--------|---------------|--------------|--------------|---------------|--------------|---------------|---------------|---------------|---------------|---------------|---------------|---------------|---------------|---------------|---------------|---------------|
| Zn-Pb | -0.486 | -0.143        | -0.029       | 0.029        | 0.371         | 0.257        | 0.429         | <b>0.771</b>  | 0.600         | <b>0.771</b>  | 0.714         | <b>0.829</b>  | <b>-0.771</b> | 0.486         | 0.257         | -0.143        | 0.600         |
| Zn-Cr | -0.143 | 0.714         | 0.714        | 0.714        | -0.314        | 0.600        | 0.029         | -0.600        | -0.086        | 0.029         | 0.429         | 0.143         | 0.143         | <b>0.886</b>  | 0.543         | -0.086        | -0.200        |
| Zn-Bi | -0.657 | 0.714         | 0.371        | 0.714        | -0.714        | <b>0.771</b> | -0.714        | 0.257         | 0.116         | 0.257         | 0.314         | -0.200        | -0.486        | 0.314         | 0.609         | -0.371        | <b>-0.943</b> |
| Zn-Se | -0.486 | 0.314         | -0.200       | 0.371        | 0.086         | 0.257        | <b>0.886</b>  | -0.486        | <b>0.829</b>  | <b>0.771</b>  | <b>-0.771</b> | <b>-0.886</b> | 0.143         | 0.143         | 0.143         | -0.086        | 0.029         |
| Zn-Hg | 0.600  | 0.486         | <b>0.771</b> | 0.257        | 0.086         | 0.600        | 0.200         | 0.371         | 0.200         | -0.371        | 0.257         | <b>0.829</b>  | 0.086         | -0.657        | -0.429        | 0.486         | -0.029        |
| Cu-As | -0.257 | -0.657        | -0.314       | -0.086       | -0.714        | -0.314       | -0.543        | -0.143        | <b>0.771</b>  | 0.486         | -0.600        | 0.029         | -0.257        | 0.029         | 0.657         | -0.543        | 0.371         |
| Cu-Cd | 0.257  | -0.314        | 0.371        | -0.143       | -0.600        | -0.086       | 0.257         | -0.143        | <b>-0.829</b> | 0.086         | -0.657        | -0.257        | 0.257         | -0.314        | -0.429        | -0.029        | 0.543         |
| Cu-Pb | -0.257 | -0.486        | -0.086       | -0.543       | 0.371         | -0.314       | 0.086         | <b>1.000</b>  | <b>-0.771</b> | <b>-0.829</b> | -0.086        | -0.429        | -0.600        | -0.714        | 0.543         | 0.486         | 0.086         |
| Cu-Cr | 0.486  | -0.429        | <b>0.943</b> | -0.143       | 0.029         | -0.143       | 0.429         | <b>-0.829</b> | <b>0.829</b>  | -0.429        | <b>0.943</b>  | 0.200         | 0.200         | -0.429        | 0.371         | 0.371         | 0.657         |
| Cu-Bi | -0.257 | -0.429        | -0.029       | -0.143       | -0.600        | -0.086       | 0.371         | 0.714         | <b>-0.812</b> | -0.429        | -0.029        | 0.143         | -0.200        | 0.600         | 0.464         | -0.029        | 0.486         |
| Cu-Se | -0.200 | <b>-0.771</b> | -0.314       | -0.257       | -0.029        | -0.200       | -0.257        | -0.543        | <b>-0.771</b> | <b>-0.886</b> | -0.086        | 0.429         | -0.486        | <b>-0.943</b> | <b>-0.829</b> | -0.086        | 0.086         |
| Cu-Hg | 0.486  | 0.086         | 0.600        | 0.600        | -0.257        | 0.486        | 0.600         | 0.257         | -0.429        | -0.029        | 0.257         | <b>-0.771</b> | 0.600         | 0.314         | 0.029         | -0.029        | 0.314         |
| As-Cd | 0.200  | 0.543         | -0.371       | 0.657        | <b>0.943</b>  | 0.543        | <b>-0.886</b> | 0.657         | <b>-0.943</b> | 0.029         | <b>0.771</b>  | 0.200         | -0.600        | -0.314        | -0.486        | 0.143         | 0.714         |
| As-Pb | -0.371 | 0.486         | 0.429        | 0.257        | -0.600        | 0.657        | 0.486         | -0.143        | <b>-1.000</b> | -0.257        | 0.600         | -0.543        | 0.257         | 0.543         | -0.029        | 0.200         | -0.486        |
| As-Cr | -0.029 | 0.486         | -0.486       | 0.657        | 0.086         | 0.714        | 0.314         | 0.486         | 0.600         | <b>-0.771</b> | -0.657        | 0.486         | 0.543         | 0.543         | 0.029         | 0.086         | -0.143        |
| As-Bi | -0.314 | 0.486         | 0.143        | 0.657        | <b>0.943</b>  | 0.543        | -0.657        | 0.143         | -0.667        | -0.143        | 0.257         | <b>0.886</b>  | <b>-0.771</b> | 0.429         | 0.029         | 0.143         | 0.657         |
| As-Se | -0.714 | <b>0.771</b>  | -0.371       | 0.486        | -0.314        | <b>0.829</b> | 0.429         | -0.257        | <b>-0.886</b> | -0.371        | -0.371        | 0.314         | <b>0.771</b>  | -0.086        | <b>-0.829</b> | 0.429         | -0.086        |
| As-Hg | 0.600  | 0.029         | 0.314        | -0.143       | -0.029        | -0.371       | -0.600        | <b>-0.771</b> | -0.429        | -0.257        | -0.200        | 0.143         | -0.143        | <b>-0.771</b> | 0.029         | -0.029        | -0.200        |
| Cd-Pb | 0.543  | 0.143         | -0.257       | 0.143        | <b>-0.771</b> | 0.714        | -0.371        | -0.143        | <b>0.943</b>  | -0.029        | 0.543         | 0.371         | 0.143         | -0.086        | -0.086        | 0.486         | -0.257        |
| Cd-Cr | 0.086  | <b>0.943</b>  | 0.543        | <b>1.000</b> | -0.086        | <b>0.943</b> | -0.657        | 0.143         | -0.657        | 0.029         | -0.600        | 0.657         | -0.257        | -0.543        | -0.257        | -0.143        | 0.371         |
| Cd-Bi | 0.143  | <b>0.943</b>  | <b>0.829</b> | <b>1.000</b> | <b>1.000</b>  | <b>1.000</b> | <b>0.771</b>  | 0.143         | 0.725         | <b>-0.886</b> | 0.714         | 0.486         | 0.371         | -0.543        | 0.000         | <b>-0.886</b> | 0.371         |
| Cd-Se | -0.257 | <b>0.771</b>  | 0.657        | <b>0.886</b> | -0.371        | <b>0.771</b> | -0.600        | -0.257        | <b>0.943</b>  | 0.143         | -0.429        | -0.143        | <b>-0.771</b> | 0.143         | 0.371         | <b>-0.771</b> | -0.429        |
| Cd-Hg | 0.714  | 0.600         | -0.029       | 0.429        | -0.200        | 0.371        | 0.314         | <b>-0.771</b> | 0.200         | 0.086         | 0.371         | 0.143         | -0.371        | 0.371         | -0.029        | 0.657         | 0.143         |
| Pb-Cr | -0.371 | 0.257         | -0.029       | 0.143        | 0.657         | <b>0.886</b> | 0.029         | <b>-0.829</b> | -0.600        | 0.143         | -0.257        | 0.200         | 0.257         | 0.543         | 0.143         | 0.714         | -0.086        |
| Pb-Bi | 0.714  | 0.257         | -0.086       | 0.143        | <b>-0.771</b> | 0.714        | -0.429        | 0.714         | 0.667         | 0.486         | 0.371         | -0.486        | 0.200         | 0.086         | 0.348         | -0.486        | <b>-0.771</b> |
| Pb-Se | 0.314  | 0.257         | -0.600       | 0.086        | -0.086        | <b>0.829</b> | 0.086         | -0.543        | <b>0.886</b>  | 0.657         | <b>-0.943</b> | <b>-0.886</b> | 0.086         | <b>0.771</b>  | -0.257        | -0.029        | 0.029         |

|                                   |               |              |        |              |        |              |               |        |               |        |              |        |        |               |              |               |        |
|-----------------------------------|---------------|--------------|--------|--------------|--------|--------------|---------------|--------|---------------|--------|--------------|--------|--------|---------------|--------------|---------------|--------|
| Pb-Hg                             | -0.086        | -0.429       | -0.257 | -0.257       | 0.600  | 0.314        | -0.200        | 0.257  | 0.429         | -0.029 | 0.200        | 0.543  | -0.543 | <b>-0.829</b> | -0.657       | 0.543         | 0.429  |
| Cr-Bi                             | -0.086        | <b>1.000</b> | 0.086  | <b>1.000</b> | -0.086 | <b>0.943</b> | -0.257        | -0.371 | <b>-0.986</b> | 0.029  | 0.086        | 0.543  | -0.200 | -0.143        | <b>0.928</b> | -0.086        | 0.314  |
| Cr-Se                             | -0.371        | <b>0.829</b> | -0.143 | <b>0.886</b> | -0.429 | <b>0.886</b> | 0.200         | 0.600  | -0.600        | 0.600  | 0.029        | -0.143 | -0.029 | 0.371         | 0.143        | 0.486         | -0.257 |
| Cr-Hg                             | 0.257         | 0.371        | 0.314  | 0.429        | 0.429  | 0.314        | 0.029         | -0.257 | -0.314        | -0.371 | 0.371        | 0.200  | -0.086 | -0.543        | 0.314        | 0.429         | 0.486  |
| Bi-Se                             | -0.086        | <b>0.829</b> | 0.657  | <b>0.886</b> | -0.371 | <b>0.771</b> | <b>-0.771</b> | -0.086 | 0.638         | 0.143  | -0.429       | 0.371  | -0.657 | -0.371        | 0.058        | <b>0.771</b>  | 0.086  |
| Bi-Hg                             | -0.143        | 0.371        | -0.029 | 0.429        | -0.200 | 0.371        | 0.086         | 0.086  | 0.232         | -0.086 | <b>0.886</b> | -0.143 | -0.200 | -0.371        | 0.145        | <b>-0.886</b> | -0.143 |
| Se-Hg                             | <b>-0.771</b> | 0.200        | -0.371 | 0.371        | -0.486 | 0.029        | 0.371         | 0.486  | 0.314         | -0.314 | -0.371       | -0.657 | 0.086  | -0.371        | -0.029       | -0.429        | -0.714 |
| <b>Number of significant SCCs</b> | 12            | 34           | 11     | 19           | 24     | 22           | 10            | 23     | 24            | 17     | 27           | 19     | 10     | 20            | 11           | 15            | 11     |

**Supplementary Table 2. Distribution of DCCs between different groups**

| Element-element<br>interaction | 3×Tg-AD Vs. WT (AD-related DCCs) |                   |                    |                    |                   |                   | Se-treated Vs.3×Tg-AD (Se-related DCCs) |             |             |            |             |
|--------------------------------|----------------------------------|-------------------|--------------------|--------------------|-------------------|-------------------|-----------------------------------------|-------------|-------------|------------|-------------|
|                                | 2-month                          | 4-month           | 6-month            | 8-month            | 10-month          | 12-month          | 4-month                                 | 6-month     | 8-month     | 10-month   | 12-month    |
| <i>AD-specific (33)</i>        |                                  |                   |                    |                    |                   |                   |                                         |             |             |            |             |
| Fe-Ca                          | -0.857142857                     | <b>1.54285714</b> | -0.91428571        | -0.26882231        | <b>1.440668</b>   | 0.68571429        | -0.28571429                             | 0.91428571  | -0.85714286 | -0.8       | -0.51428571 |
| Fe-Bi                          | -0.514285714                     | <b>1.25714286</b> | 0.34244002         | -0.34285714        | -0.1714286        | -0.2857143        | -0.91428571                             | 0.80041712  | 0.521376809 | -1.0285714 | 0.4         |
| Mg-Pb                          | <b>1.2</b>                       | -0.2285714        | 0.285714286        | -0.05714286        | -0.4571429        | 0.68571429        | 0.571428571                             | 0.74285714  | -0.11428571 | 0.68571429 | 0           |
| Mg-Cr                          | 0                                | -0.1714286        | -0.62857143        | <b>1.142857143</b> | 0.5714286         | 0.68571429        | -0.74285714                             | 0.97142857  | -0.28571429 | -0.8571429 | -0.28571429 |
| Mg-Se                          | 0.514285714                      | -0.1142857        | 0.057142857        | <b>1.085714286</b> | 0.7428571         | 0.05714286        | -0.34285714                             | 0.17142857  | -0.22857143 | -0.4571429 | 1.028571429 |
| Ca-V                           | -0.685714286                     | <b>-1.7142857</b> | 0.285714286        | 0.578519666        | -0.2488004        | 0.4               | 0.742857143                             | -0.05714286 | -0.22857143 | 0.74285714 | 0.228571429 |
| Ca-Cd                          | -0.171428571                     | <b>-1.2</b>       | -0.51428571        | 0.054222995        | 0.0667367         | 0.51428571        | 0.228571429                             | -0.17142857 | -0.68571429 | 0.22857143 | -1.02857143 |
| V-Co                           | -0.914285714                     | <b>-1.3142857</b> | -0.28571429        | -0.8               | <b>-1.6</b>       | -0.8              | -0.17142857                             | 0.34285714  | -0.22857143 | 0.68571429 | -0.74285714 |
| V-Zn                           | -0.8                             | <b>-1.3142857</b> | -0.4               | 0.4                | 0.8               | -0.0571429        | 0.685714286                             | 0.28571429  | -0.74285714 | -0.6285714 | -0.22857143 |
| V-Cr                           | -0.685714286                     | -0.5714286        | -1.02857143        | -0.4               | -0.9142857        | <b>-1.2</b>       | -0.91428571                             | 0.8         | -0.17142857 | 0.51428571 | -0.17142857 |
| V-Bi                           | 0.171428571                      | <b>-1.6</b>       | 0.383108021        | -0.17142857        | -1.0285714        | <b>-1.2</b>       | 0.8                                     | -0.21167945 | -0.22398307 | 0.85714286 | 0.742857143 |
| V-Hg                           | -0.857142857                     | <b>-1.1428571</b> | 0.4                | -0.11428571        | -0.4571429        | 0.22857143        | 0.057142857                             | -0.74285714 | -0.4        | -0.3428571 | 0.057142857 |
| Mn-Co                          | 0.285714286                      | -0.2857143        | 0.514285714        | <b>1.142857143</b> | <b>1.4857143</b>  | -0.2285714        | -0.36809159                             | -0.91428571 | -0.05714286 | -0.2857143 | 0.628571429 |
| Mn-Bi                          | -0.571428571                     | -0.0571429        | 0.490719764        | 1.028571429        | <b>1.1428571</b>  | 0.17142857        | -0.91470284                             | -0.31929119 | -0.48821702 | -0.3428571 | -0.05714286 |
| Mn-Se                          | 0.228571429                      | -1.0285714        | <b>1.2</b>         | <b>1.371428571</b> | -0.2857143        | -0.5142857        | 0.545359882                             | -0.11428571 | -0.51428571 | 0.28571429 | 0.171428571 |
| Co-Zn                          | -0.514285714                     | -0.5142857        | -0.45714286        | -0.45714286        | 0.8571429         | <b>-1.3714286</b> | 0.171428571                             | -0.22857143 | 0.114285714 | -0.9714286 | 0.857142857 |
| Co-As                          | -0.285714286                     | -0.3428571        | -0.05714286        | -0.57142857        | <b>-1.6571429</b> | -0.3428571        | 0.114285714                             | 0.51428571  | 0.8         | 0.74285714 | -0.57142857 |
| Co-Cr                          | -0.114285714                     | <b>-1.4285714</b> | -0.85714286        | -0.97142857        | <b>1.3142857</b>  | -0.5714286        | 0.457142857                             | -0.34285714 | 0.285714286 | -0.4571429 | 0.514285714 |
| Co-Hg                          | -1.028571429                     | -0.8571429        | 0.4                | -0.45714286        | 0.5714286         | <b>-1.1428571</b> | 0.342857143                             | -0.11428571 | 0.171428571 | -0.3428571 | 0.914285714 |
| Zn-Cr                          | 0.171428571                      | <b>-1.3142857</b> | -0.8               | -0.68571429        | 0.7428571         | -0.4571429        | 0.742857143                             | 0.97142857  | 0.514285714 | -0.5142857 | -0.34285714 |
| Zn-Se                          | <b>1.371428571</b>               | -0.8              | 1.028571429        | 0.4                | -0.8571429        | <b>-1.1428571</b> | 0.628571429                             | -0.68571429 | -0.62857143 | 0.68571429 | 0.914285714 |
| Cu-As                          | -0.285714286                     | 0.51428571        | <b>1.085714286</b> | 0.571428571        | 0.1142857         | 0.34285714        | -0.11428571                             | -0.74285714 | 0.171428571 | 0.05714286 | 0.342857143 |

|       |              |            |             |             |            |            |             |             |             |            |             |
|-------|--------------|------------|-------------|-------------|------------|------------|-------------|-------------|-------------|------------|-------------|
| Cu-Cd | 0            | 0.17142857 | -1.2        | 0.228571429 | -0.0571429 | -0.1714286 | 0.4         | 0.51428571  | -0.51428571 | 0.62857143 | 0.8         |
| As-Cr | 0.342857143  | 0          | 1.085714286 | -1.42857143 | -0.7428571 | -0.2285714 | 0.057142857 | -0.05714286 | 0.8         | 0.74285714 | -0.62857143 |
| As-Se | 1.142857143  | -1.0285714 | -0.51428571 | -0.85714286 | -0.0571429 | -0.5142857 | 1.028571429 | 0.8         | -0.45714286 | 0.8        | -0.4        |
| As-Hg | -1.2         | -0.8       | -0.74285714 | -0.11428571 | -0.1714286 | 0.51428571 | 0.628571429 | -0.34285714 | 0.285714286 | 0.17142857 | -0.34285714 |
| Cd-Pb | -0.914285714 | -0.2857143 | 1.2         | -0.17142857 | 1.3142857  | -0.3428571 | 0.285714286 | -1.02857143 | -0.05714286 | -0.0571429 | -0.62857143 |
| Cd-Cr | -0.742857143 | -0.8       | -1.2        | -0.97142857 | -0.5142857 | -0.2857143 | -0.4        | 0.11428571  | -0.28571429 | 0.45714286 | -0.28571429 |
| Cd-Hg | -0.4         | -1.3714286 | 0.228571429 | -0.34285714 | 0.5714286  | -0.2285714 | 0.4         | 0.17142857  | -0.11428571 | 0.28571429 | 0           |
| Pb-Bi | -1.142857143 | 0.45714286 | 0.752450977 | 0.342857143 | 1.1428571  | -1.2       | -0.51428571 | -0.58102241 | -0.13785166 | -0.8571429 | -0.28571429 |
| Pb-Se | -0.228571429 | -0.8       | 1.485714286 | 0.571428571 | -0.8571429 | -1.7142857 | 0.628571429 | -0.11428571 | -0.91428571 | 0.91428571 | 0.914285714 |
| Cr-Bi | -0.171428571 | -1.3714286 | -1.07132505 | -0.97142857 | 0.1714286  | -0.4       | 0.171428571 | 0.84275362  | 0.899062228 | -0.1714286 | -0.22857143 |
| Se-Hg | 1.142857143  | 0.28571429 | 0.685714286 | -0.68571429 | 0.1142857  | -0.6857143 | -0.4        | -0.68571429 | 0.285714286 | -0.0571429 | -0.05714286 |

*Overlapped (30)*

|       |              |            |             |             |            |            |             |             |             |            |             |
|-------|--------------|------------|-------------|-------------|------------|------------|-------------|-------------|-------------|------------|-------------|
| Fe-Mn | -0.628571429 | 1.48571429 | 0.342857143 | -0.17142857 | 1.0285714  | -0.4571429 | -1.20458836 | -0.51428571 | -0.8        | -0.6857143 | -0.11428571 |
| Fe-Co | -1.257142857 | 1.2        | 0.114285714 | -0.28571429 | 0.5142857  | -0.4571429 | -1.37142857 | -0.28571429 | 0.628571429 | -0.6857143 | 1.428571429 |
| Fe-Cu | 0.171428571  | 0.11428571 | -0.68571429 | -1.2        | -0.0571429 | -1.0285714 | -0.11428571 | 0.4         | 1.428571429 | -0.3428571 | 0.685714286 |
| Fe-Pb | -1.314285714 | 1.6        | 0.342857143 | 0.628571429 | 0.5142857  | 1.31428571 | -1.2        | 0.05714286  | 0.228571429 | 0          | -0.4        |
| Ca-Mn | -0.342857143 | -0.0571429 | -1.37142857 | -0.48905127 | 0.1328462  | 0.34285714 | -0.91470284 | 1.54285714  | -0.05714286 | -1.6571429 | -1.25714286 |
| Ca-Co | 0.114285714  | -0.5142857 | -0.74285714 | 0.114702837 | 1.4646511  | -0.4       | -0.91428571 | 0.97142857  | -0.68571429 | -1.4857143 | 0.457142857 |
| Ca-Cu | 0.285714286  | 1.37142857 | 0.4         | -0.29030264 | 1.0298228  | -1.0285714 | -0.51428571 | -0.4        | -0.4        | -1.3142857 | 0.228571429 |
| Ca-Cr | -0.457142857 | -1.7714286 | 0.285714286 | -0.11720558 | 0.9710114  | 0.45714286 | 1.085714286 | 0.74285714  | -0.74285714 | -0.6285714 | -0.97142857 |
| Ca-Se | 0.514285714  | -1.2       | -0.74285714 | 0.545359882 | -0.2613141 | -0.5714286 | 0.628571429 | 0.8         | -0.34285714 | 0.22857143 | 1.828571429 |
| Ca-Hg | -0.057142857 | 0.11428571 | -1.02857143 | -1.2054226  | -0.2953081 | -0.1714286 | -0.11428571 | 0.45714286  | 0.514285714 | -0.0571429 | -1.48571429 |
| V-Mn  | -0.628571429 | -1.6571429 | 0.285714286 | 1.485714286 | 0.3428571  | 0.34285714 | 0.277788945 | -0.34285714 | -1.25714286 | 0.34285714 | 0.342857143 |
| V-As  | -0.742857143 | -0.5142857 | -0.8        | -1.08571429 | -0.0571429 | -1.3714286 | -0.4        | 0.17142857  | -0.17142857 | -1.2571429 | 0.971428571 |
| V-Pb  | -1.085714286 | -0.9714286 | -0.57142857 | 0.628571429 | 1.1428571  | -0.6857143 | 0.685714286 | -0.11428571 | -0.05714286 | -1.2       | -0.34285714 |
| Mn-Cu | 0.171428571  | 1.2        | -0.97142857 | -1.42857143 | 0.1714286  | -1.6       | -1.29071976 | -0.05714286 | 0.457142857 | -0.5714286 | 0.685714286 |

|                         |                     |                   |                    |                    |                  |                   |                    |                    |                    |                   |                    |
|-------------------------|---------------------|-------------------|--------------------|--------------------|------------------|-------------------|--------------------|--------------------|--------------------|-------------------|--------------------|
| Mn-As                   | 0.4                 | -0.4              | <b>-1.14285714</b> | -0.11428571        | 0.6285714        | 0.34285714        | 0.580188159        | <b>1.08571429</b>  | 0.457142857        | 0.62857143        | -0.57142857        |
| Mn-Pb                   | 0.228571429         | 0.51428571        | 0.742857143        | <b>1.428571429</b> | -0.5714286       | 0.74285714        | -0.42106321        | 0                  | <b>-1.37142857</b> | 0.17142857        | -0.8               |
| Mn-Cr                   | 0.285714286         | <b>-1.6</b>       | -0.62857143        | 0.8                | 0.8              | 0.34285714        | <b>1.497810859</b> | <b>1.25714286</b>  | -0.45714286        | -0.9142857        | 0.114285714        |
| Co-Cu                   | -0.057142857        | 0.8               | -0.91428571        | 0.171428571        | <b>1.4857143</b> | 1.02857143        | -0.91428571        | <b>1.08571429</b>  | 0.685714286        | 0                 | -0.34285714        |
| Co-Cd                   | <b>-1.085714286</b> | -0.2857143        | -0.51428571        | -0.05714286        | <b>-1.6</b>      | -0.6857143        | <b>-1.54285714</b> | -0.68571429        | -0.91428571        | 0.8               | -0.34285714        |
| Co-Bi                   | -0.4                | -0.4              | -0.39958288        | <b>-1.6</b>        | -0.9714286       | -0.5142857        | -0.62857143        | 0.45672573         | <b>1.062982582</b> | 0                 | -0.34285714        |
| Co-Se                   | 0.228571429         | <b>-1.1428571</b> | -0.05714286        | -0.91428571        | 0.2285714        | -0.1142857        | 0.971428571        | <b>-1.14285714</b> | -0.8               | 0                 | -0.28571429        |
| Zn-Cu                   | -0.285714286        | 0.45714286        | <b>-1.2</b>        | -0.97142857        | -0.2285714       | <b>-1.1428571</b> | -0.4               | 0.28571429         | 0.857142857        | <b>-1.4285714</b> | 0.228571429        |
| Cu-Pb                   | 0.342857143         | <b>1.48571429</b> | -0.68571429        | -0.28571429        | -0.4571429       | -0.1142857        | <b>-1.6</b>        | 0.05714286         | <b>1.371428571</b> | 0.57142857        | 0.514285714        |
| Cu-Bi                   | 0.628571429         | <b>1.14285714</b> | -0.78310802        | -0.28571429        | 0.5714286        | 0.22857143        | -0.91428571        | <b>1.41167945</b>  | 0.892388257        | 0                 | 0.342857143        |
| Cu-Hg                   | 0.114285714         | 0.17142857        | -1.02857143        | -0.62857143        | 0.5142857        | <b>-1.2571429</b> | 0.342857143        | 0.74285714         | 0.057142857        | -0.2857143        | <b>1.085714286</b> |
| As-Cd                   | <b>-1.085714286</b> | 0.11428571        | -0.57142857        | -0.62857143        | -0.1714286       | -0.3428571        | <b>-1.25714286</b> | 0.62857143         | -0.51428571        | -0.6285714        | 0.514285714        |
| As-Pb                   | 0.857142857         | -0.6285714        | <b>-1.42857143</b> | -0.51428571        | <b>1.2</b>       | <b>-1.2</b>       | 0.4                | <b>1.54285714</b>  | 0.228571429        | -0.4              | 0.057142857        |
| Cd-Bi                   | 0.628571429         | -0.8              | -0.10385763        | <b>-1.88571429</b> | -0.2857143       | -0.5142857        | 0.228571429        | <b>-1.26757094</b> | 0.885714286        | <b>-1.6</b>       | -0.11428571        |
| Pb-Cr                   | 0.4                 | <b>-1.0857143</b> | -0.57142857        | 0                  | -0.9142857       | -0.6857143        | <b>1.085714286</b> | <b>1.14285714</b>  | 0                  | 0.97142857        | -0.28571429        |
| Bi-Hg                   | 0.228571429         | -0.2857143        | 0.260479843        | -0.51428571        | <b>1.0857143</b> | -0.5142857        | -0.28571429        | -0.60333699        | 0.230657045        | <b>-1.7714286</b> | 0                  |
| <i>Se-specific (19)</i> |                     |                   |                    |                    |                  |                   |                    |                    |                    |                   |                    |
| Fe-V                    | -0.685714286        | 0.11428571        | 0.285714286        | 0.685714286        | -0.3428571       | 0.4               | <b>1.085714286</b> | 0.28571429         | -0.11428571        | -0.3428571        | -0.45714286        |
| Fe-Se                   | 0.914285714         | 0                 | 0.685714286        | 0.742857143        | 0.0571429        | -0.5714286        | 0.228571429        | -0.51428571        | <b>-1.25714286</b> | -0.5142857        | <b>1.428571429</b> |
| Fe-Hg                   | 0.057142857         | 0.22857143        | 0.457142857        | -0.62857143        | 0.6857143        | 0.62857143        | 0.171428571        | <b>-1.54285714</b> | 0.342857143        | 0.45714286        | -0.68571429        |
| Mg-Ca                   | 0.4                 | -0.5714286        | -0.22857143        | -0.38310802        | 0.8269029        | -0.0571429        | -0.45714286        | -0.22857143        | -1.02857143        | <b>-1.5428571</b> | -0.17142857        |
| Mg-Cd                   | -0.114285714        | -0.1714286        | -0.17142857        | 0.4                | -0.6285714       | 0.91428571        | -0.11428571        | -0.17142857        | 0                  | <b>1.42857143</b> | <b>-1.31428571</b> |
| Mg-Hg                   | -0.4                | 0.05714286        | -0.34285714        | -0.62857143        | -0.4571429       | -0.5714286        | -0.74285714        | <b>-1.31428571</b> | <b>1.485714286</b> | 0.28571429        | -0.11428571        |
| Ca-Zn                   | 0.228571429         | 0.17142857        | -0.97142857        | 0.079040314        | 0.0227317        | 0.68571429        | -0.97142857        | <b>1.48571429</b>  | -0.91428571        | 0.05714286        | -0.8               |
| Ca-Bi                   | -0.4                | -0.4              | -0.28696566        | -0.46006272        | 0.752451         | -0.1714286        | <b>-1.31428571</b> | 0.05839423         | -0.58352514        | -0.1142857        | 0.171428571        |
| V-Cu                    | -0.571428571        | -0.2857143        | -0.68571429        | -0.62857143        | -0.1142857       | 0.4               | 0.742857143        | 0.8                | <b>1.142857143</b> | 1.02857143        | -0.17142857        |

|       |              |            |             |             |            |            |                    |                    |             |                   |             |
|-------|--------------|------------|-------------|-------------|------------|------------|--------------------|--------------------|-------------|-------------------|-------------|
| V-Cd  | -0.342857143 | -0.8       | 0.114285714 | -0.85714286 | -0.3428571 | -0.6857143 | 0.685714286        | -0.91428571        | 0.285714286 | <b>-1.3714286</b> | -0.05714286 |
| Mn-Hg | -0.342857143 | -0.0571429 | -0.11428571 | 0.4         | -0.1142857 | 0.05714286 | -0.66381683        | <b>-1.31428571</b> | -0.17142857 | -0.4              | 0           |
| Co-Pb | 0.228571429  | 0.34285714 | 0.914285714 | 0           | 0.5142857  | -1.0285714 | -0.8               | <b>-1.37142857</b> | -0.11428571 | <b>1.14285714</b> | 0.457142857 |
| Zn-As | -0.285714286 | -0.1714286 | -0.74285714 | -0.62857143 | 1.0285714  | -0.2285714 | 0.342857143        | <b>1.25714286</b>  | 0.057142857 | 0.22857143        | -0.62857143 |
| Zn-Cd | -0.8         | -1.0285714 | 0.171428571 | -0.62857143 | 0.8        | -0.4       | 0                  | <b>-1.48571429</b> | -0.17142857 | 0.22857143        | -0.8        |
| Zn-Pb | 0.914285714  | 0.91428571 | 0.628571429 | 0.742857143 | 0.3428571  | 0.57142857 | <b>-1.54285714</b> | -0.11428571        | -0.51428571 | -0.8571429        | -0.22857143 |
| Cu-Cr | -0.057142857 | -0.4       | -0.11428571 | -0.28571429 | 0.9142857  | 0.34285714 | 1.028571429        | <b>-1.25714286</b> | 0.8         | -0.5714286        | 0.457142857 |
| As-Bi | -0.342857143 | -0.3428571 | -0.80959383 | -0.8        | -0.6857143 | 0.34285714 | -0.91428571        | <b>1.09530812</b>  | 0.171845695 | -0.1142857        | -0.22857143 |
| Pb-Hg | -0.114285714 | 0.68571429 | 0.685714286 | 0.228571429 | -0.4       | 0.22857143 | -0.8               | <b>-1.25714286</b> | -0.62857143 | 0.34285714        | -0.11428571 |
| Bi-Se | -0.685714286 | -0.9142857 | -0.01939472 | -0.74285714 | -0.0571429 | -0.4       | -0.57142857        | -1.00917671        | -0.08488004 | <b>1.2</b>        | -0.28571429 |

**Supplementary Table 3. The list of differentially changed elements (DCEs) between Se-treated and WT mice**

| <b>Age</b> | <b>DCEs with increased level</b> | <b>DCEs with decreased level</b> |
|------------|----------------------------------|----------------------------------|
| 4-month    | Mg, Zn, Cu, As, Bi, Se, Hg       | Cr                               |
| 6-month    | Ca, Zn, Cu, As, Bi, Se, Hg       | -                                |
| 8-month    | Ca, Zn, Cu, As, Hg               | Mn, Pb, Bi,                      |
| 10-month   | Ca, Zn, As, Hg, Pb               | V, Mn                            |
| 12-month   | Ca, Zn, Cd, Pb, Cr, Hg           | Fe, V, Mn                        |
